# Supplementary material
Source: PubMed Central journal article supplement (PMC5501773)
Supplement: mmc1.pdf [file mmc1.pdf]

**The American Journal of Human Genetics, Volume 101**

## **Supplemental Data**

### **Ultra-sensitive Sequencing Identifies High Prevalence of Clonal Hematopoiesis-Associated Mutations throughout Adult Life**

**Rocio Acuna-Hidalgo, Hilal Sengul, Marloes Steehouwer, Maartje van de Vorst, Sita H. Vermeulen, Lambertus A.L.M. Kiemeney, Joris A. Veltman, Christian Gilissen, and Alexander Hoischen**

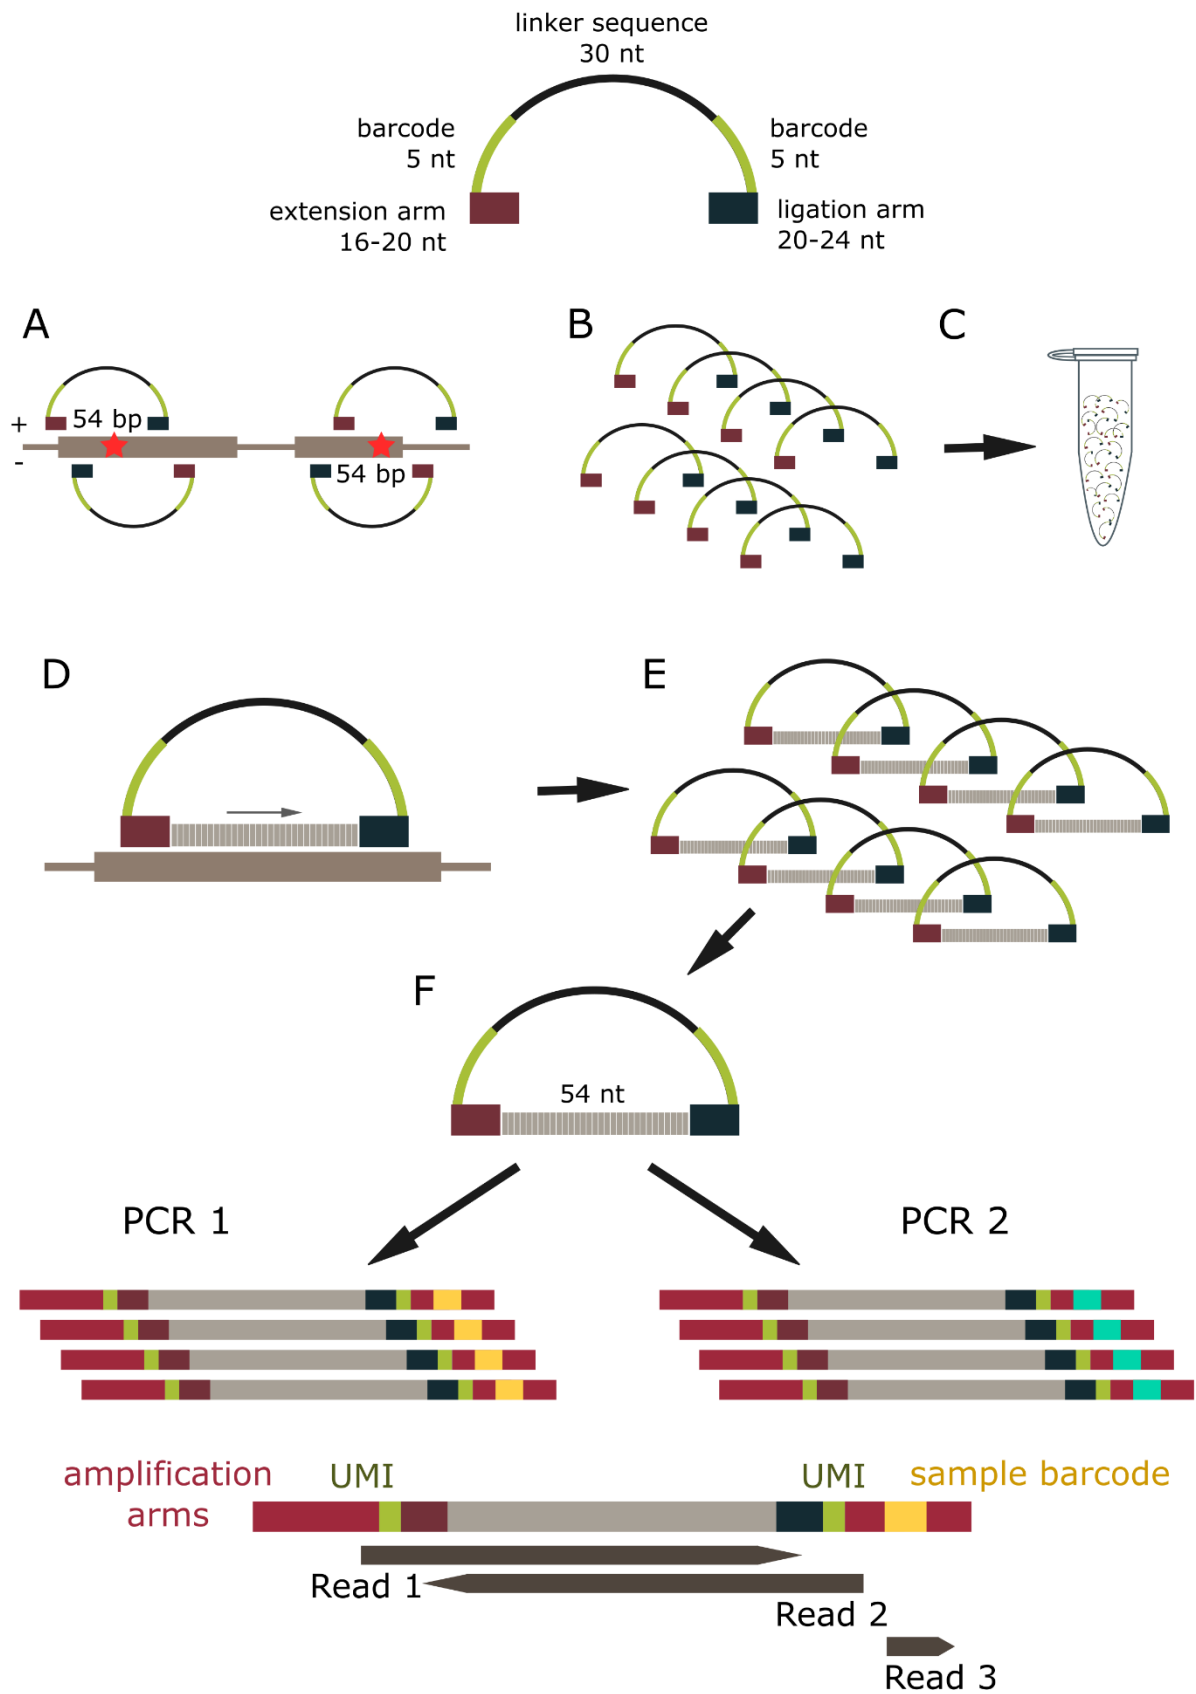

**Figure S1. Overview of smMIP protocol used in this study.** Each smMIP is a single stranded 80 nucleotide-long DNA molecule consisting of the extension and the ligation arm (shown in burgundy and blue, respectively) which together are 40 nucleotides long and are designed to be complementary to the targeted region. The two arms are connected by a 30 nucleotide-long linker sequence (in black). Each smMIP contains a unique molecule identifier (UMI) composed by 2 barcodes of random 5 nucleotide sequences (shown in green). The smMIPs are designed for double tiling of regions of interest containing mutations (shown as red star) on the plus and the minus strand (A). The smMIPs are ordered as long oligonucleotides (B), after which they are pooled and phosphorylated (C). Individual smMIPs were pooled equimolarly and phosphorylated using T4 polynucleotide kinase and 10x T4 DNA ligase buffer supplemented with 10mM ATP (New England Biolabs). DNA capture is performed by mixing the phosphorylated smMIP probes with the DNA, dNTPs, polymerase and ligase to form the reverse complement of the region of interest to which the probe binds and ligate the probe into a circular single strand of DNA (D). The smMIP capture was performed on 8 $\mu$ l of input DNA (200 ng) supplied with 17 $\mu$ l of capture mixture (0.01 $\mu$ l Ampligase DNA ligase (100U/ $\mu$ l, Illumina), 2.5 $\mu$ l 10x ampligase buffer (Illumina), 0.28 $\mu$ l phosphorylated smMIP pool dilution (corresponding to a DNA:smMIP ratio of 1:8000), 0.32 $\mu$ l Hemo Klentaq (10U/ $\mu$ l, New England Biolabs), 0.03 $\mu$ l dNTPs (0.25mM) and 13.86 $\mu$ l H<sub>2</sub>O). The capture mix was incubated for 18-22 hours at 60°C. The mix is then digested with exonuclease to remove all linear DNA molecules (E). Immediately after capture, the mix was cooled and treated with exonuclease (0.5 $\mu$ l Exonuclease I (New England Biolabs), 0.5 $\mu$ l Exonuclease III (New England Biolabs), 0.2 $\mu$ l 10x Ampligase buffer (Illumina) and 0.8 $\mu$ l H<sub>2</sub>O for 45 minutes at 37°C and 2 minutes at 95°C to inactivate the exonucleases). We subsequently separated the captured and circularized molecules in two separate technical replicates and performed PCR amplification separately (F), using a sample and PCR-specific barcode (shown in yellow and cyan). Each exo-treated sample was split in two technical replicates of 10 $\mu$ l, which were then amplified and barcoded by PCR independently (1.25 $\mu$ l of barcoded reverse primer (10 $\mu$ M), 12.5 $\mu$ l 2x iProof (BioRad Laboratories), 0.125 $\mu$ l forward primer (100 $\mu$ M) and 1.8 $\mu$ l H<sub>2</sub>O). The PCR products were run on gel, pooled, purified using AmpureXP beads (Agencourt) and sequenced on an Illumina Nextseq platform using 2x79bp reads.

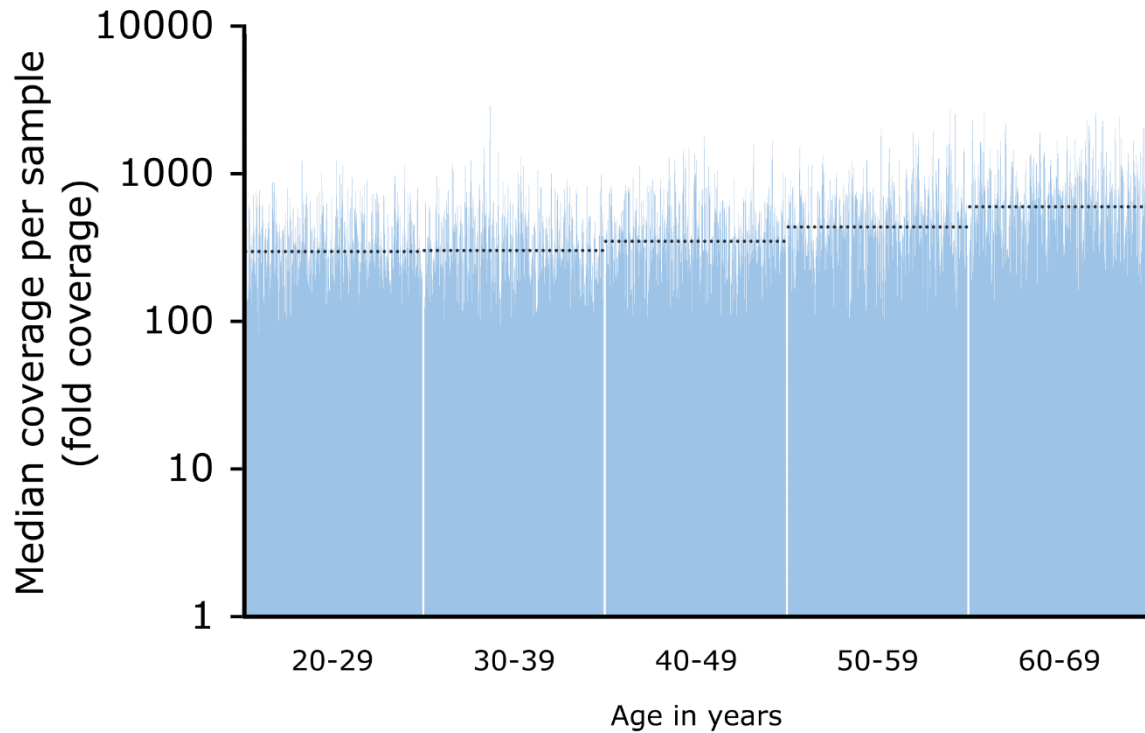

**Figure S2.** Median unique sequencing coverage per sample, corresponding to the number of unique DNA molecules sequenced per sample and per position after removal of PCR duplicates. Each sample is represented here by two bars, corresponding to each technical replicate. The median unique sequencing coverage per age group is shown as a horizontal dotted line. The overall median unique sequencing coverage was 418-fold per replicate and 845-fold per sample.

|              | Mean age | Median age | Total | Included | Male | Male (%) | Female | Female (%) |
|--------------|----------|------------|-------|----------|------|----------|--------|------------|
| <b>20-29</b> | 24.7     | 25         | 400   | 396      | 195  | 49.5     | 201    | 50.5       |
| <b>30-39</b> | 34.6     | 35         | 405   | 402      | 202  | 50.2     | 200    | 49.8       |
| <b>40-49</b> | 44.7     | 45         | 404   | 404      | 202  | 50.0     | 202    | 50.0       |
| <b>50-59</b> | 54.3     | 55         | 403   | 402      | 202  | 50.2     | 200    | 49.8       |
| <b>60-69</b> | 64.5     | 64         | 402   | 402      | 201  | 50       | 201    | 50         |
| <b>Total</b> | 44.6     | 45         | 2014  | 2006     | 1002 | 50.0     | 1004   | 50.0       |

**Table S1.** Age and sex of participants in our study.

**Table S2.** Selection of loci to screen for somatic mutations in blood of healthy controls. Previous reports used include Xie *et al*, Genovese *et al*, Jaiswal *et al* and Mckerrell *et al*.<sup>1-4</sup>

**Table S3.** Sequencing coverage per smMIP and per age group.

**Table S4.** Positions used for the generation of pileup files.

**Table S5.** List of all somatic mutations identified in coding regions in this study. Samples with more than one mutation are marked with a superscript letter for identification.
